# Supplementary material for: A design strategy of exciton blocking materials using simulations and the analysis of device properties
Source: Royal Society of Chemistry journal article supplement (doi:10.1039/d3tc00808h), 2023-01-01
Supplement: d3tc00808h1.pdf [file d3tc00808h1.pdf]

## Supporting information

### Design strategy of exciton blocking materials using simulation and analysis of device properties

Young Hun Jung,<sup>a</sup> Ramanaskanda Braveenth,<sup>a,b</sup> Seung Hyun Lee,<sup>a</sup> Su Bin Oh,<sup>c</sup> Hyuna Lee,<sup>a</sup> Hye In Yang,<sup>a</sup> Jun Hyeog Oh,<sup>a</sup> Hye-Rin Kim,<sup>a</sup> Bo-Mi Kim<sup>\*b</sup> and Jang Hyuk Kwon<sup>\*a</sup>

<sup>a</sup> Department of Information Display, Kyung Hee University, Seoul 02447, South Korea.

<sup>b</sup> Department of Chemical Engineering, Wonkwang University, Iksan, 570-749, South Korea.

<sup>c</sup> Division of Bio-Nanochemistry, College of Natural Sciences, Wonkwang University, Iksan, 570-749, South Korea.

### Synthetic Procedure

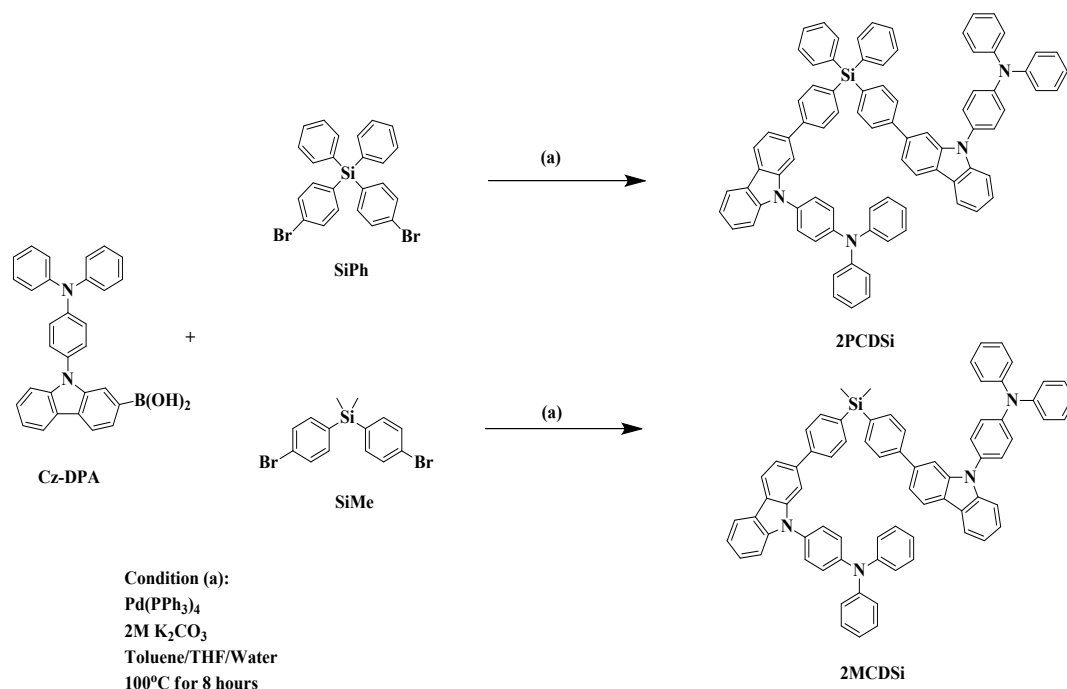

**Scheme 1.** The synthetic procedures of target materials, **2PCDSi** and **2MCDSi**.

#### Synthesis of 2PCDSi

A mixture of bis(4-bromophenyl)diphenylsilane **SiPh** (2.0 g, 4.05 mmol), (9-(4-(diphenylamino)phenyl)-9H-carbazol-2-yl)boronic acid **Cz-DPA** (4.04 g, 8.90 mmol), tetrakis(triphenylphosphine)palladium(0) Pd(PPh<sub>3</sub>)<sub>4</sub> (0.28 g, 0.24 mmol), potassium carbonate (13.82 g, 2M in 50 ml water), 20 ml of THF and 80 ml of toluene were added in to a two neck 250 ml round bottom flask equipped with condenser. Then, the mixture was refluxed for 8 hours under an inert condition. Reaction progress was monitored using TLC and after the reaction completion, reaction mixture was worked-up using chloroform (100 ml) and water (50 ml). The collected organic layer was dried over anhydrous sodium sulfate. After filtration through a celite pad, crude mixture was concentrated under vacuum condition using a rotary evaporator. After complete evaporation, crude mixture was dissolved well in chloroform and filtered through a silica pad. Finally, the target molecule of **2PCDSi** was obtained from recrystallization using minimum amount of chloroform and *n*-Hexane.

**Yield:** 67 %; Colourless solid; <sup>1</sup>H NMR (500 MHz, CDCl<sub>3</sub>) δ 8.19 (d, *J*=8 Hz, 2H), 8.15 (d, *J*=8 Hz, 2H), 7.68-7.72 (m, 8H), 7.65 (d, *J*=8 Hz, 6H), 7.56 (d, *J*=8 Hz, 2H), 7.41-7.48 (m, 14H), 7.31 (t, *J*=8.5 Hz, 10H), 7.25 (d, *J*=8 Hz, 4H), 7.20-7.22 (m, 8H), 7.06 (t, *J*=7.5 Hz, 4H); <sup>13</sup>C NMR (125 MHz, CDCl<sub>3</sub>) δ 147.3, 147.1, 143.0, 141.6, 141.5, 138.9, 136.8, 136.3, 134.1, 132.6, 130.9, 129.6, 129.4, 127.9, 127.8, 127.0, 125.9, 124.8, 123.6, 123.4, 122.8, 122.6, 120.5, 120.2, 119.8, 119.4, 109.8,

108.3; HRMS  $[M+H]^+$   $m/z$ : Anal. calcd. For  $C_{84}H_{60}N_4Si$ , 1152.4587; found, 1153.4664.

#### Synthesis of 2MCDSi

A mixture of bis(4-bromophenyl)dimethylsilane **SiMe** (2.0 g, 5.43 mmol), (9-(4-(diphenylamino)phenyl)-9H-carbazol-2-yl)boronic acid **Cz-DPA** (5.43 g, 11.96 mmol), Tetrakis(triphenylphosphine)palladium(0)  $Pd(PPh_3)_4$  (0.50 g, 0.43 mmol), potassium carbonate (13.82 g, 2M in 50 ml water) and 100 ml of toluene were added in to a two neck 250 ml round bottom flask equipped with condenser. Then, the mixture was refluxed for 8 hours under an inert condition. Reaction progress was monitored using TLC and after the reaction completion, reaction mixture was worked-up using ethylacetate (80 ml) and water (50 ml) twice. The collected organic layer was dried over anhydrous sodium sulfate. After filtration through a celite pad, crude mixture was concentrated under vacuum condition using a rotary evaporator. After complete evaporation, crude mixture was dissolved well in minimum amount of ethylacetate and *n*-hexane was added slowly, stirred at room temperature for overnight, and then the collected precipitated was well washed with *n*-hexane. Again, the precipitate was dissolved in hot toluene and stirred at room temperature after adding little amount of *n*-hexane to obtain the target molecule of **2MCDSi**.

**Yield:** 74 %; Colourless solid;  $^1H$  NMR (400 MHz,  $CDCl_3$ )  $\delta$  8.17 (d,  $J=8$  Hz, 2H), 8.13 (d,  $J=8$  Hz, 2H), 7.74-7.81 (m, 4H), 7.61-7.63 (m, 8H), 7.38-7.53 (m, 16H), 7.25-7.32 (m, 10H), 7.19-7.23 (m, 4H), 7.04-7.07 (m, 4H), 0.62 (s, 6H);  $^{13}C$  NMR (100 MHz,  $CDCl_3$ )  $\delta$  149.6, 149.4, 145.1, 143.8, 141.4, 138.9, 136.9, 133.2, 131.8, 131.7, 130.2, 130.1, 129.6, 129.5, 128.1, 127.2, 127.1, 126.0, 125.7, 125.1, 124.7, 122.5, 122.1, 121.7, 112.1, 110.6, 2.2; HRMS (ESI)  $m/z$ : Anal. calcd. For  $C_{74}H_{56}N_4Si$ , 1028.4274; found, 1028.4277.

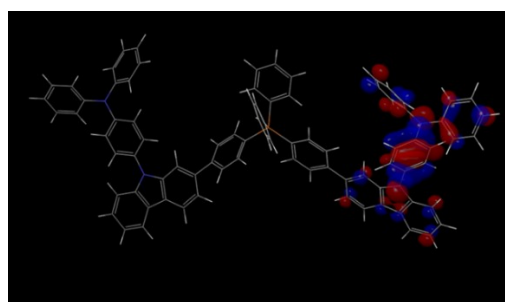

HOMO

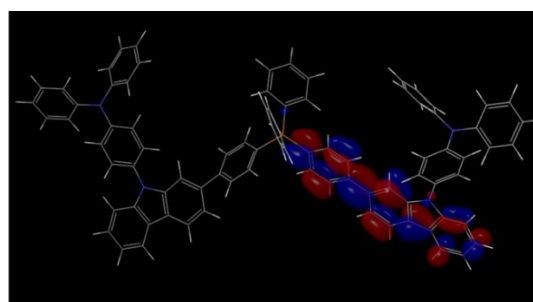

LUMO

**Figure S1.** HOMO and LUMO distribution of 2PCDSi.

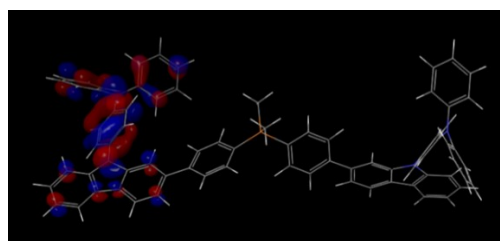

HOMO

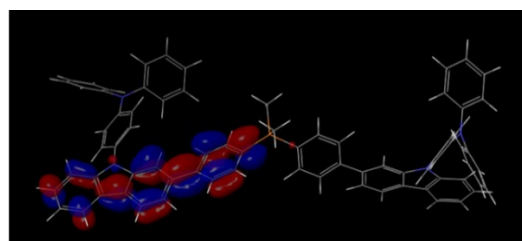

LUMO

**Figure S2.** HOMO and LUMO distribution of 2MCDSi.

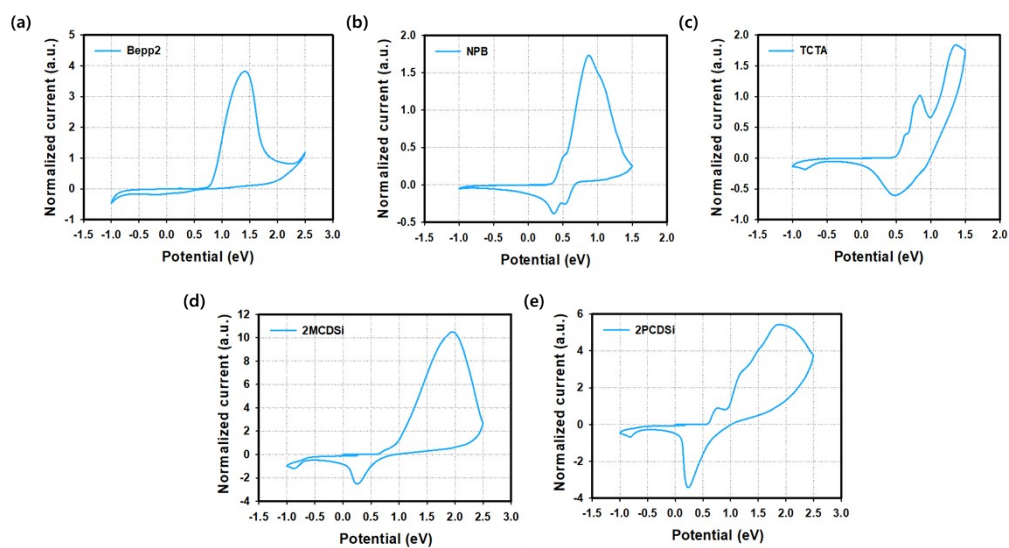

**Figure S3.** Cyclic-Voltammetry measurements for (a) Bepp2 (b) NPB (c) TCTA (d) 2MCDSi (e) 2PCDSi.

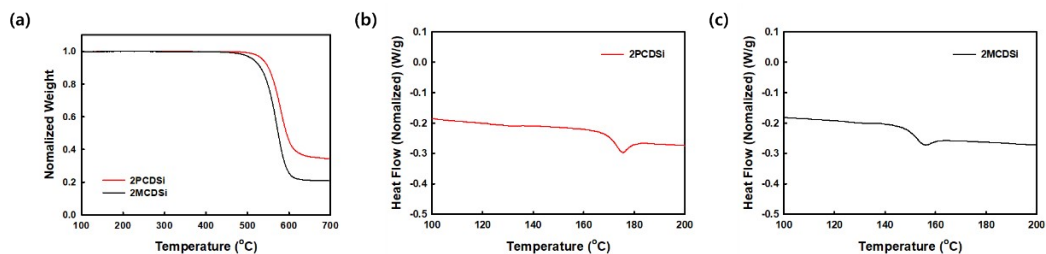

**Figure S4.** Thermal properties (a) TGA (b)&(c) DSC of 2PCDSi and 2MCDSi.

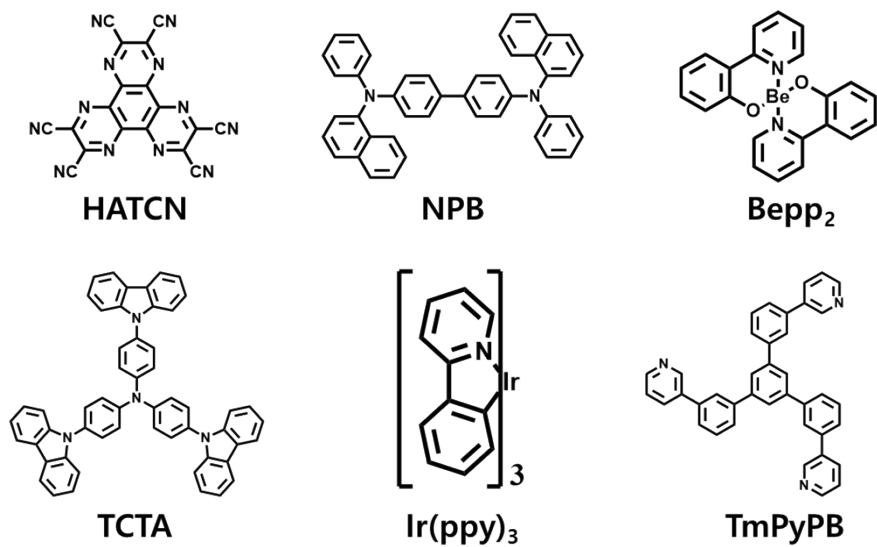

**Figure S5.** Molecular structures used for device fabrication.

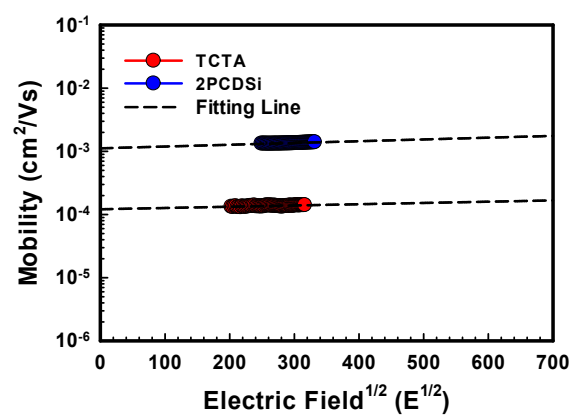

**Figure S6.** Space Charge Limited Current (SCLC) mobility of TCTA and 2PCDSi

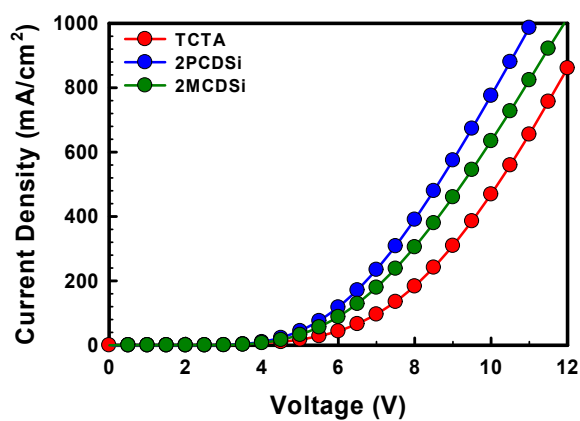

**Figure S7.** Hole Only Device of TCTA, 2PCDSi and 2MCDSi

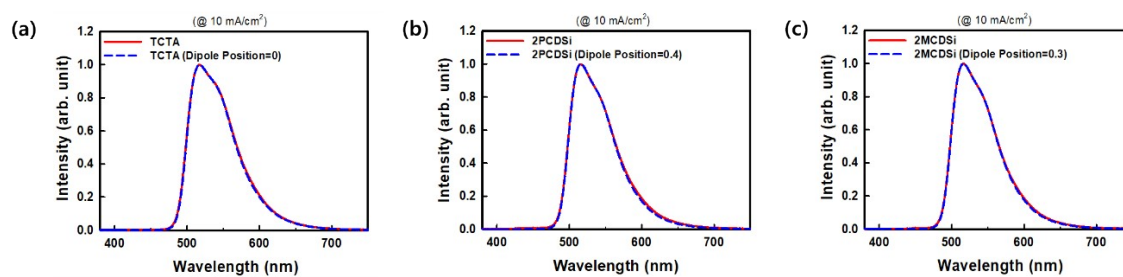

**Figure S8.** Fitted spectrum with TCTA, 2PCDSi, and 2MCDSi based OLED.

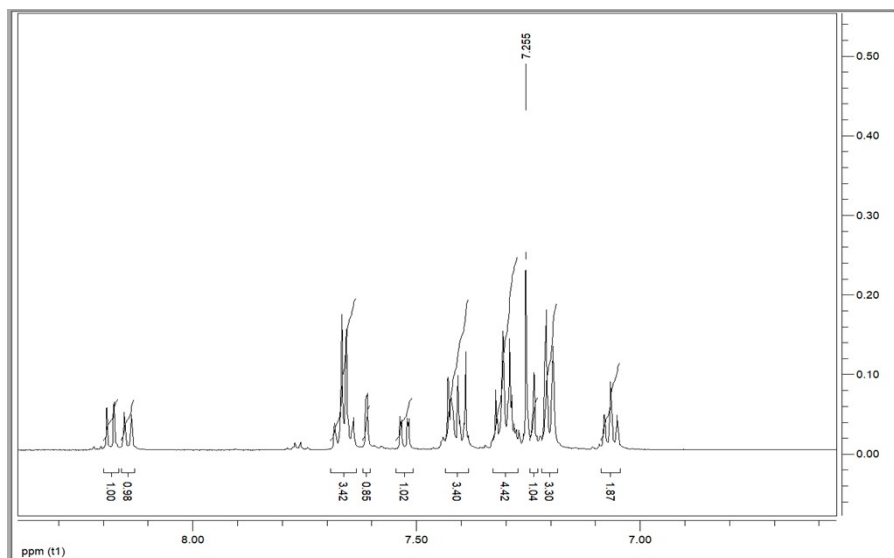

Figure S9. <sup>1</sup>H-NMR of 2PCDSi

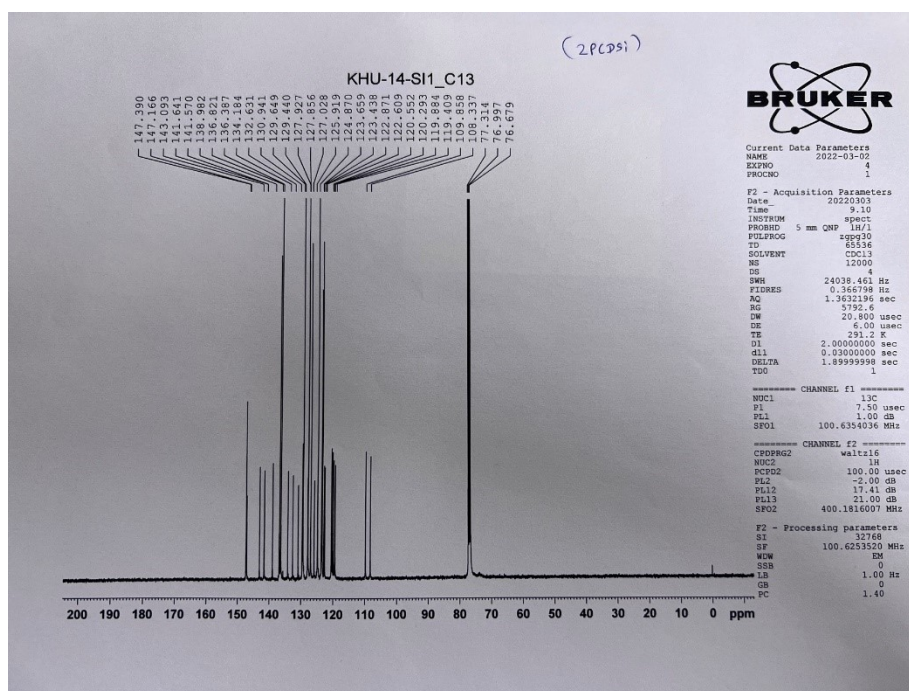

Figure S10. <sup>13</sup>C-NMR of 2PCDSi

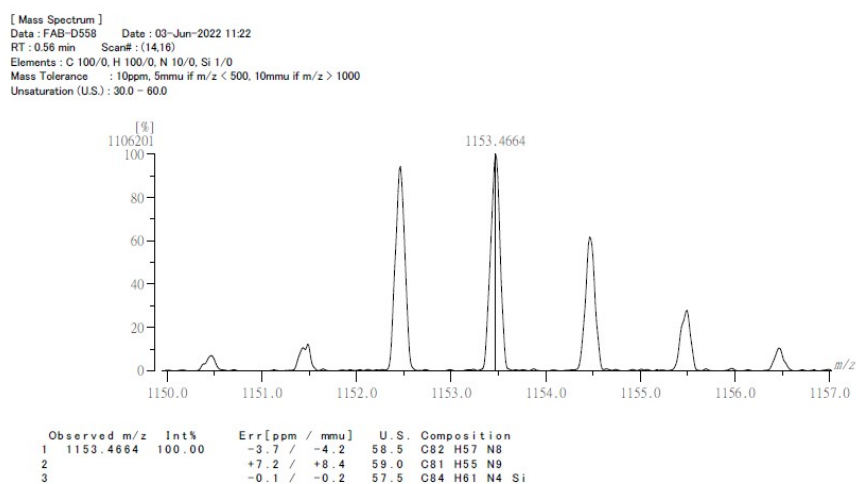

**Figure S11.** High Resolution Mass spectrum of 2PCDSi

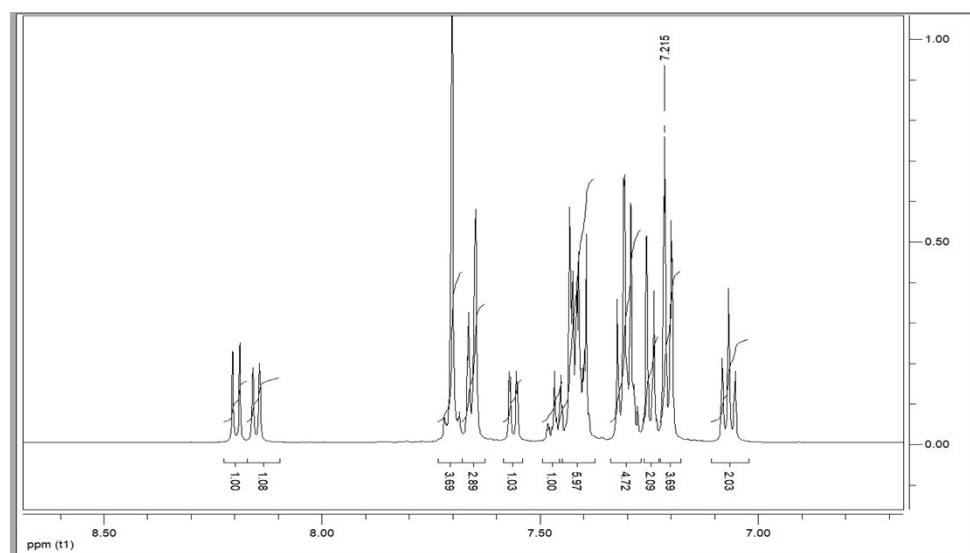

**Figure S12.**  $^1\text{H}$ -NMR of 2MCDSi

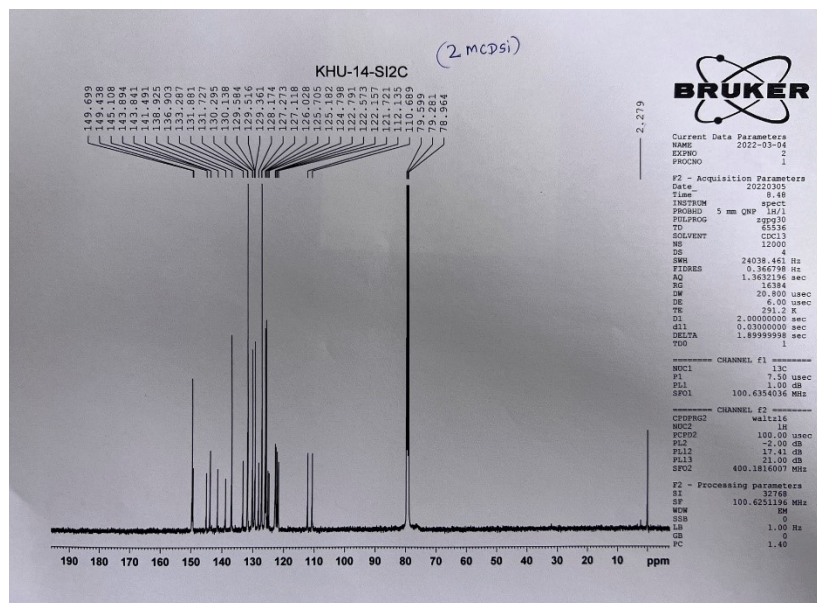

**Figure S13.**  $^{13}\text{C}$ -NMR of 2MCDSi

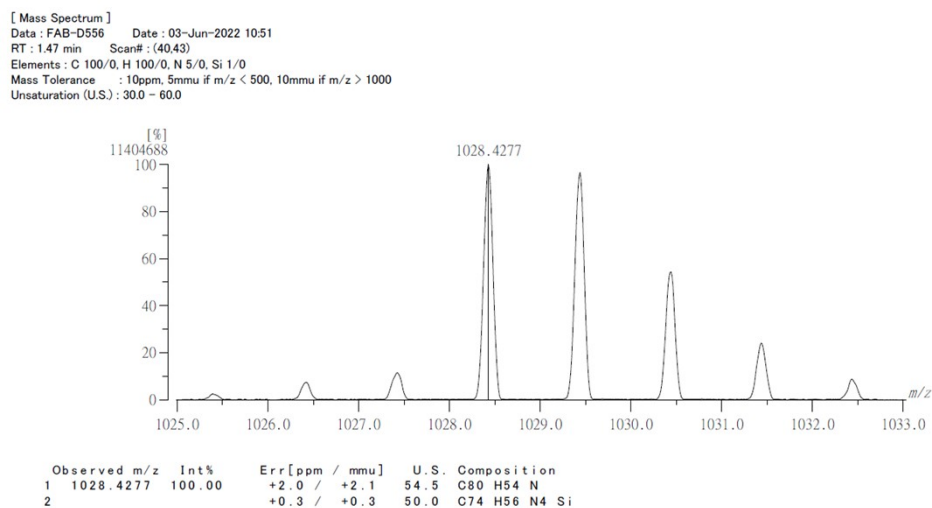

**Figure S14.** High Resolution Mass spectrum of 2MCDSi

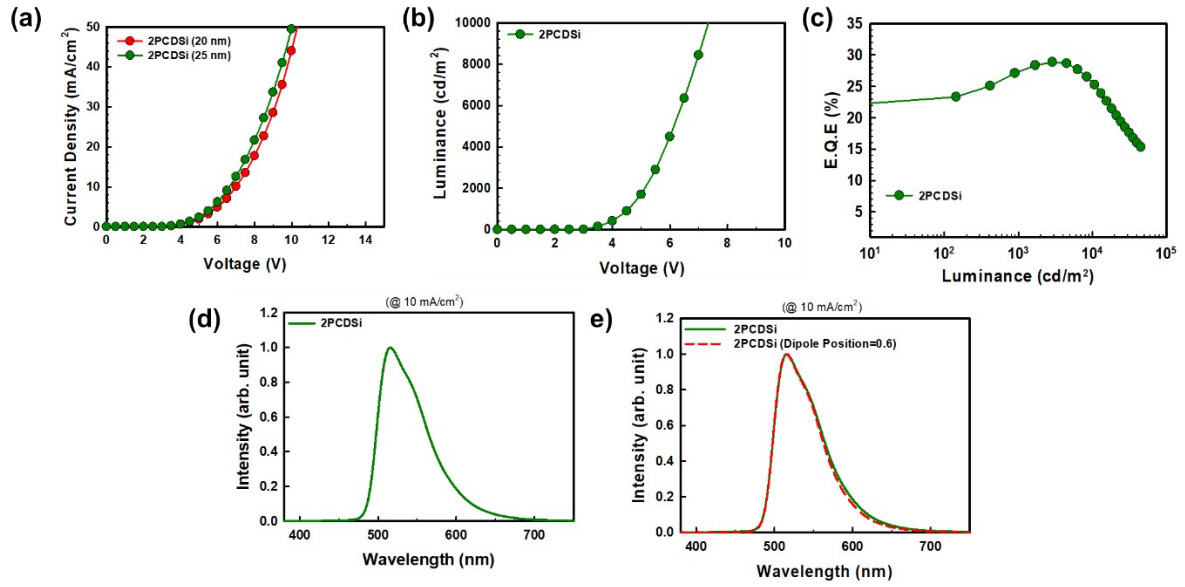

**Figure S15.** Increased 2PCDSi thickness. Device structure: ITO (50 nm)/ HATCN(7 nm)/ NPB (48nm)/ 2PCDSi (25nm)/ Be(pp)<sub>2</sub> : 5.5 wt% Ir(ppy)<sub>3</sub> (25nm)/ TmPyPB (40nm)/ LiF (1.5nm)/ Al (100nm). (a) J (Current density)-V (Voltage), (b) L (Luminescence)-V (Voltage) (c) EQE (External Quantum Efficiency)-L (Luminescence) (d) EL spectra at 10mA/cm<sup>2</sup>. (e), (f) Fitted spectrum with 2PCDSi based OLED.

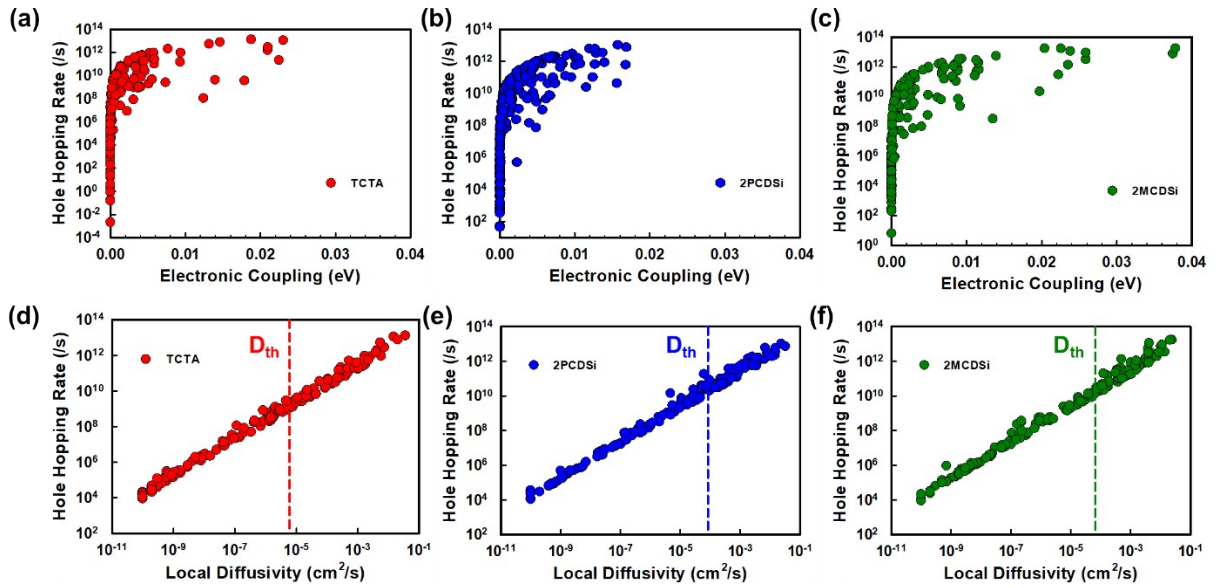

**Figure S16.** (a), (b), (c) hole hopping rate according to electronic coupling, (d), (e), (f) threshold diffusivity ( $D_{th}$ ) that start to be attributed to hole diffusivity of TCTA, 2PCDSi, and 2MCDSi, respectively.

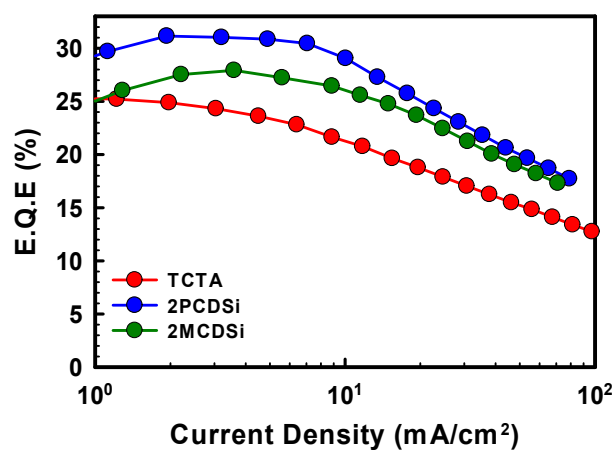

**Figure S17.** EQE (External Quantum Efficiency)- J (Current Density) plot of TCTA, 2PCDSi, and 2MCDSi.

**Table S1.** Calculated hole mobility through simulation ( $\mu_{h,Simul}$ ) and Measured hole mobility through SCLC method ( $\mu_{h,exp}$ ).

|        | $\mu_{h,Simul}$ (cm <sup>2</sup> /V) | $\mu_{h,exp}$ (cm <sup>2</sup> /V) |
|--------|--------------------------------------|------------------------------------|
| TCTA   | $2.46 \times 10^{-4}$                | $1.26 \times 10^{-4}$              |
| 2PCDSi | $3.29 \times 10^{-3}$                | $1.12 \times 10^{-3}$              |
| 2MCDSi | $2.81 \times 10^{-3}$                | -                                  |
